# Supplementary material for: A shared agenda for gender and COVID-19 research: priorities based on broadening engagement in science
Source: HighWire-hosted journal article supplement (doi:10.1136/bmjgh-2022-011315), 2023-05-01

Supplementary file: Social media visuals used for the shared gender and COVID-19 research agenda setting collaboration

Process of public engagement in setting shared gender and COVID-19 research priorities

### Key Social Media Metrics

The following metrics are tracked across mentions of #ResearchAgendaSetting, #GHHBuzzBoards and #BetterCOVIDScience and associated keywords and phrases.

#### Total mentions

967

#### Total Engagement

1908

#### Potential Reach (Twitter)

3 million (impressions)

#### Influencers (by reach)

| Influencer                           | Network                                                                             | Posts | Reach  |
|------------------------------------------------------------------------------------------------------------------------|-------------------------------------------------------------------------------------|-------|------------------------------------------------------------------------------------------|
|  Dr Tlaleng Mo...<br>@drtlaleng     |  | 3     | 309.8K                                                                                   |
|  UN Univers...<br>@UNUniversity     |  | 5     | 275.4K                                                                                   |
|  Asha George<br>@ashageorge72       |  | 66    | 258.1K                                                                                   |
|  UNU Intern...<br>@UNU_IIGH         |  | 130   | 250.5K                                                                                   |
|  Gender & H...<br>@genderhealthhub  |  | 190   | 196.1K                                                                                   |
|  Prof. Akiko...<br>@VirusesImmunity |  | 1     | 135.8K                                                                                   |
|  Health Syste...<br>@H_S_Global     |  | 6     | 127.8K                                                                                   |
|  Professor ...<br>@DrSenait         |  | 1     | 122.8K                                                                                   |
|  Soumya S...<br>@doctorsoumya       |  | 1     | 121.5K                                                                                   |
|  Rosemary ...<br>@RosemaryJMor...   |  | 19    | 116.7K                                                                                   |

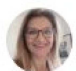

**Dr. Claire Standley**  
@ClaireJStandley

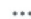

With over 100 members signed up already, this is a truly global effort, and a great opportunity to collaborate with fellow researchers and practitioners across many disciplines. Join the conversation and community today!

#GenderCOVID19 #researchagendasetting @genderhealthhub

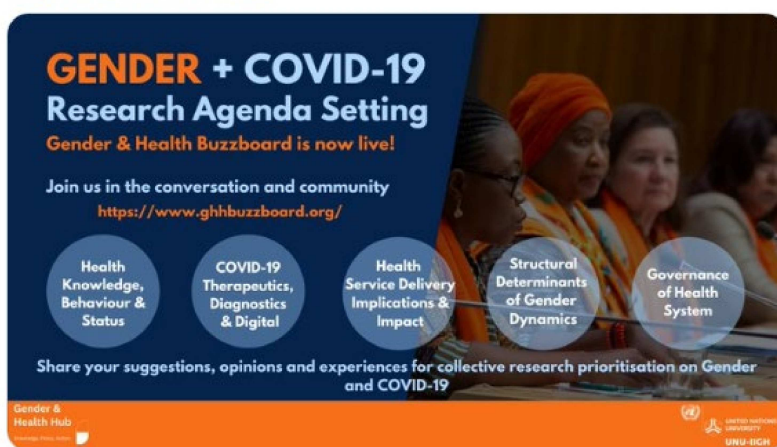

You and Asha George

9:18 PM · Jan 6, 2021 · Twitter Web App

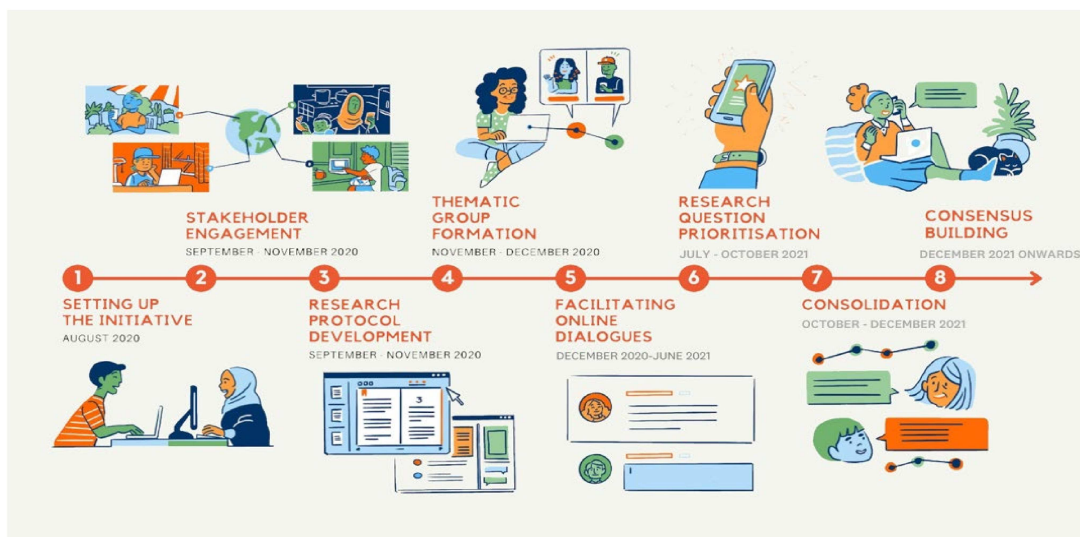

Voices articulating research priorities

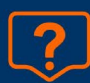

## How would you spend \$1 million on COVID-19 gender research grant money?

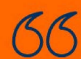

Develop infrastructure along the research pipeline- funding agencies, reviewers, editors, etc- that ensures that biological sex and/or gender is accounted for both in design and analysis of all research trials.

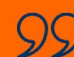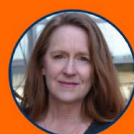

Jeannette Wolfe  
Professor of Emergency Medicine  
University of Massachusetts-Baystate, USA

#ResearchAgendaSetting

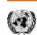

UNITED NATIONS  
UNIVERSITY  
UNU-IIGH

Gender &  
Health Hub

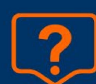

## How would you spend \$1 million on COVID-19 gender research grant money?

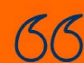

Identify the health and safety needs of women and LGBTIA+ and form responsive programs around access to health services, safe return to work and safe work environments.

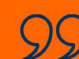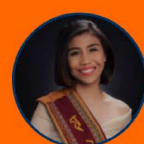

Jackielyn Ruiz  
Instructor  
University of the Philippines, Manila

#ResearchAgendaSetting

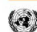

UNITED NATIONS  
UNIVERSITY  
UNU-IIGH

Gender &  
Health Hub

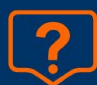

## How would you spend \$1 million on COVID-19 gender research grant money?

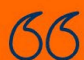

I would use the money to carry out participatory studies to help women and children in my country. I would build shelters for women and girls who are victims of Gender Based Violence

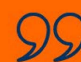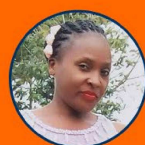

Grace Maria Kentaro  
Lecturer/PhD Student  
Makerere University, Uganda

#ResearchAgendaSetting

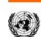

UNITED NATIONS  
UNIVERSITY  
UNU-IIGH

Gender &  
Health Hub

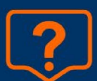

## How would you spend \$1 million on COVID-19 gender research grant money?

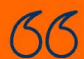

Qualitative research and analysis of pathways for gender mainstreaming in the health system in the context of covid-19 policy and action

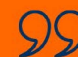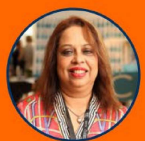

Yasmeen Qazi  
Senior Advocacy Consultant  
BMGF through RIZ Consulting, Pakistan

#ResearchAgendaSetting

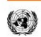

UNITED NATIONS  
UNIVERSITY  
UNU-IIGH

Gender &  
Health Hub

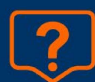

How would you spend \$1 million on COVID-19 gender research grant money?

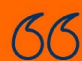

Strengthen capacity and networks between Southern countries and institutions for conducting gender and covid-19 research through peer-to-peer mentorship, training, and exchange between institutions.

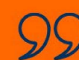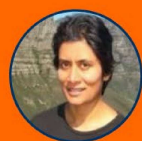

Veloshnee Govender  
Scientist  
WHO, Switzerland

#ResearchAgendaSetting

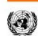

UNITED NATIONS  
UNIVERSITY  
UNU-IIGH

Gender &  
Health Hub

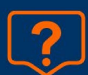

How would you spend \$1 million on COVID-19 gender research grant money?

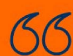

I would divide the 1 million into 2 parts - 1/3rd of the money will be for research, and the rest 2/3rd will be for grass roots community engagement and support.

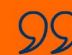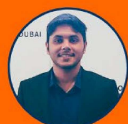

Sri Hari Govind  
Director  
Global Health Youth Foundation, India

#ResearchAgendaSetting

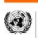

UNITED NATIONS  
UNIVERSITY  
UNU-IIGH

Gender &  
Health Hub

**?** How would you spend \$1 million on COVID-19 gender research grant money?

“ Research on how Intellectual Property protections on COVID-19 vaccines, diagnostic tools and therapeutic treatments within a pandemic has a disproportionate impact on women, and particularly marginalised and underserved groups in the Global South. ”

 **Marlise Richter**  
Senior Researcher  
Health Justice Initiative, South Africa

#ResearchAgendaSetting

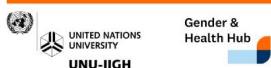

#### Regional collaborators encouraging participation

 **UNU International Institute for Global...** @UNU... · Sep 14, 2020 ...  
@UNU\_IIGH are inviting collaborators for a crowdsourced and collaborative #researchagendasetting on #GenderCOVID19. Please indicate your interest to collaborate & read the concept note here [bit.ly/33v2AVq](https://bit.ly/33v2AVq)  
@cabreulopes @Gender\_COVID19 @GlobalHlth5050 @UNUniversity

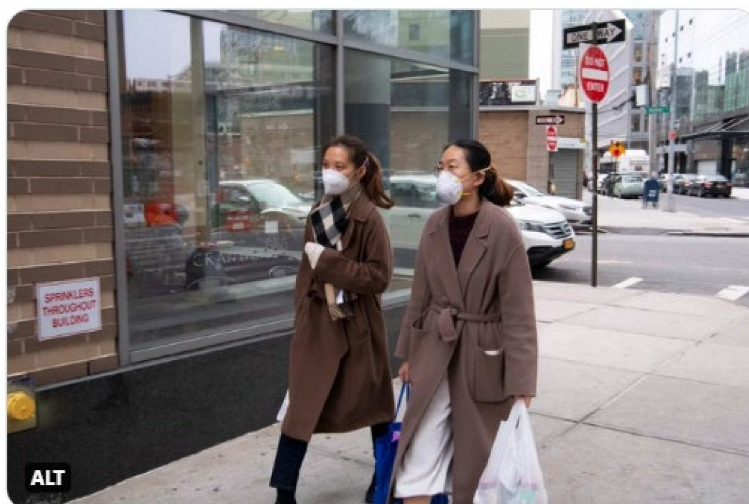

Vidisha Mishra and 7 others

17 20

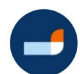

Gender & Health Hub   
@genderhealthhub

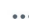

 @VianaMarisa, @RESURJ convida vozes de países lusófonos a participar na @genderhealthhub #GéneroCOVID19 #InquéritoPriorizaçãoAgendaInvestigação!

 Data limite: Quinta-feira, 30 de Setembro  
 Link para o inquérito: [go.unu.edu/ePHMr](https://go.unu.edu/ePHMr)

[Translate Tweet](#)

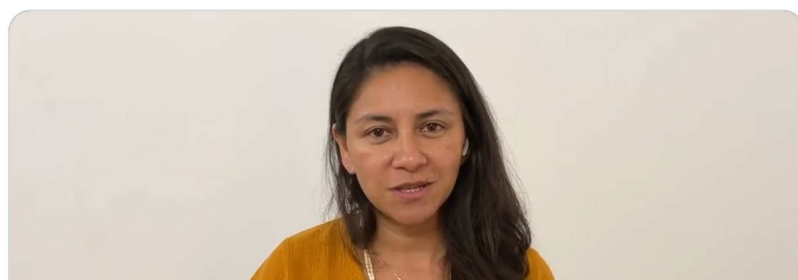

← Tweet

 Dr Kéfilath Bello, @cerrhud appelle les diverses voix francophones à participer à l'Enquête de Priorisation de la recherche sur le genre et la COVID-19.

[#GenderCOVID19](#) [#ResearchAgendaSetting](#)

 Date limite : jeudi 30 septembre  
 Lien vers l'enquête: [go.unu.edu/sejdM](https://go.unu.edu/sejdM)

[Translate Tweet](#)

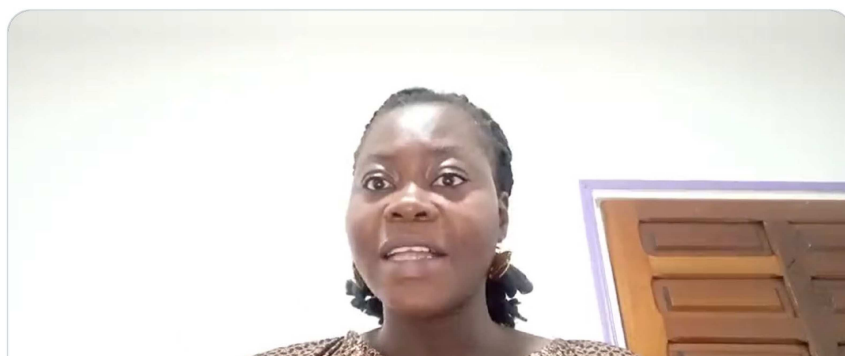

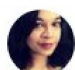

Lavanya Vijayasingham @lavanyav149 · Oct 9, 2020

Update: [#researchagendasetting](#) on [#GenderCOVID19](#) Stakeholder reach: over 60% interest from LMICs! [shorturl.at/irABG](https://shorturl.at/irABG) Call still open, protocol coming soon! [@cabreulopes](#)  
The concept note: [bit.ly/3bWF4Va](https://bit.ly/3bWF4Va)  
Tell us you're interested here: [bit.ly/33v2AVq](https://bit.ly/33v2AVq)

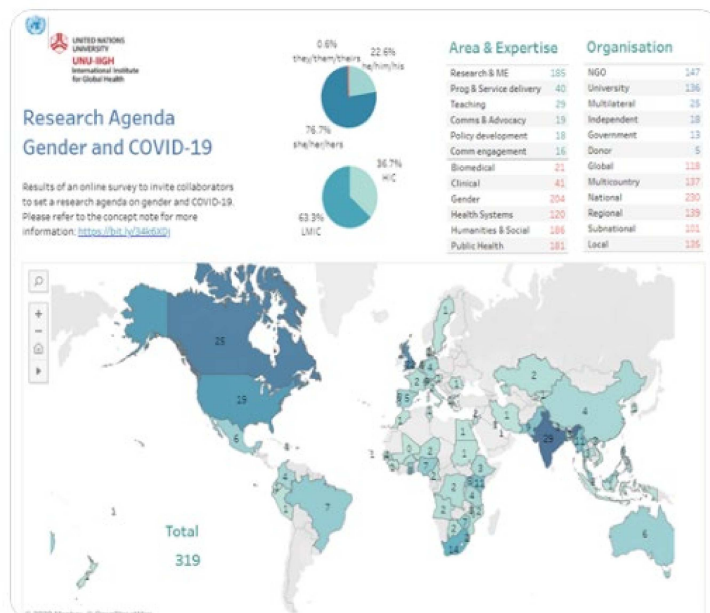

UNU International Institute for Global Health and 5 others

9 12

Raul Mercer [@FLACSOARGENTINA](#) llama a diversas voces en América Latina y el Caribe a participar en las encuestas del [@genderhealthhub](#) para establecer una agenda de investigación solidaria para [#GéneroCovid19!](#)

🕒 Fecha límite: Jueves 30 de Septiembre

🔗 Enlace: [go.unu.edu/vyuf1](https://go.unu.edu/vyuf1)

[Translate Tweet](#)

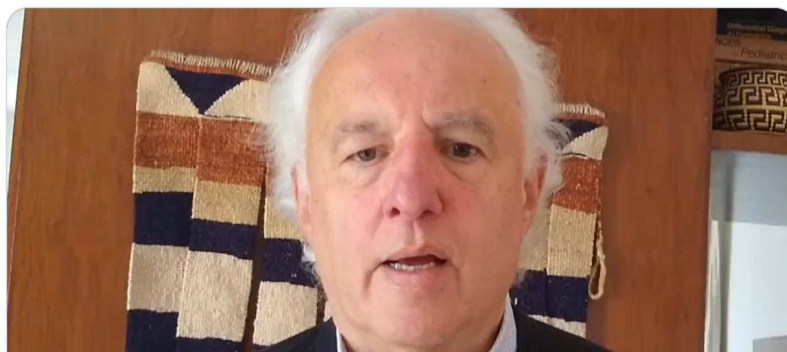



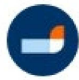

**Gender & Health Hub** @genderhealthhub · Dec 3, 2020

Our research agenda-setting exercise for #gender and #COVID19 involves 470 stakeholders from across the world, with over 66% representation from LMICs. 🌍

Get to know our community and join us: [go.unu.edu/pk7Rd](https://go.unu.edu/pk7Rd)  
#researchagendasetting

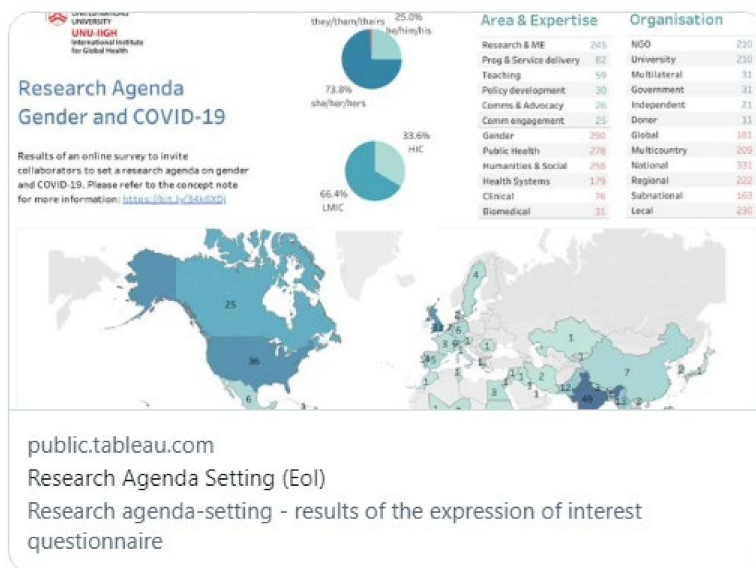

public.tableau.com  
Research Agenda Setting (Eol)  
Research agenda-setting - results of the expression of interest questionnaire

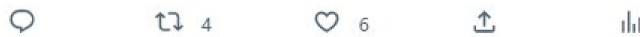

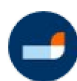

**Gender & Health Hub** @genderhealthhub · Jan 12, 2021

🔊 We want to hear your inputs on social and structural determinants of gender dynamics affecting or impacted by COVID-19!

Go to [#GBV](#) and [#COVID19](#) on thematic group 4 [#buzzboard](#) here [go.unu.edu/oNnsN](https://go.unu.edu/oNnsN)

[#genderhealthhub](#) [#infographics](#) [#ResearchAgendaSetting](#)  
[#GenderCOVID19](#)

**COVID-19 responses have led to increased risk of GBV, while diverting funding and support away from women who were already vulnerable to violence.**

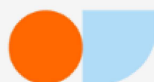

Gender & Health Hub

1   ↻   ❤   ⬆   📊

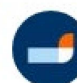

**Gender & Health Hub** @genderhealthhub · Jan 13, 2021

[#GenderCOVID19](#) research should be based on global and nuanced needs.

🔊 Researchers, let's talk to one another about priorities on next steps, on our website: [ghhbuzzboard.org](https://ghhbuzzboard.org)

[#ResearchAgendaSetting](#)

Image: Locations of unique visits.

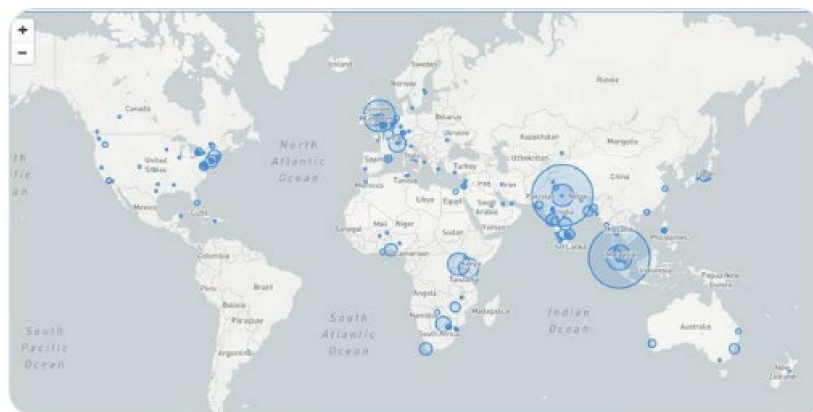

Alyson J. McGregor and 9 others

1   ↻   7   ❤   12   ⬆   📊

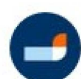

Gender & Health Hub   
@genderhealthhub

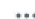

 Launch Event of the GHH Buzzboard for [#GenderCOVID19](#) and [#ResearchAgendaSetting](#): Info session and live thematic group discussions.

 Sign up here to join the discussion:  
[go.unu.edu/yQd69](https://go.unu.edu/yQd69)

**GENDER + COVID-19**  
Research Agenda Setting

Gender & Health Hub  
Knowledge. Policy. Action.

UNITED NATIONS UNIVERSITY  
UNU-IIGH  
International Institute for Global Health

Join us for an **online information session** on the ongoing collaborative research agenda setting process for gender & COVID-19.

We are **kickstarting discussions** on the **five thematic areas** below, and are excited to hear from you!

**Date:** 27th January 2021  
**Time:** 9pm Kuala Lumpur (GMT+8)  
**Registration:** <https://go.unu.edu/yQd69>

- Health Knowledge, Behaviour & Status
- Health service delivery implications & impact
- COVID-19 therapeutics, diagnostics & digital
- Structural determinants of gender dynamics
- Governance of health systems

 UNU International Institute for Global Health and 4 others

10:24 PM · Jan 25, 2021 · Twitter Web App

 View Tweet analytics

6 Retweets 1 Quote Tweet 8 Likes

 **Gender & Health Hub**  @genderhealthhub · Jan 27, 2021 ⋮  
🗣️ We are only a couple of hours away from opening up discussions for the **#ResearchAgendaSetting** process for **#GenderCOVID19** information session.

We are excited to hear from you! Do join us to partake in this online dialogue! 🗣️

 **Ateeb Ahmad Parray** @AteebParray · Jan 27, 2021  
Consider joining us tonight  
@genderhealthhub  
@UNU\_IIGH



**GENDER + COVID-19**  
**Research Agenda Setting**

Gender & Health Hub  
Knowledge. Policy. Action.

UNITED NATIONS UNIVERSITY  
**UNU-IIGH**  
International Institute for Global Health

Join us for an **online information session** on the ongoing collaborative research agenda setting process for gender & COVID-19.

We are **kickstarting discussions** on the **five thematic areas below**, and are excited to hear from you!

**Date:** 27th January 2021  
**Time:** 9pm Kuala Lumpur (GMT+8)  
**Registration:** <https://go.unu.edu/yQd69>

- Health Knowledge, Behaviour & Status
- Health service delivery implications & impact
- COVID-19 therapeutics, diagnostics & digital
- Structural determinants of gender dynamics
- Governance of health systems

🗣️ 1 ❤️ 4 📌 📊

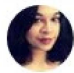

**Lavanya Vijayasingham** @lavanyav149 · Jan 29, 2021

...

What a great call & vibrant conversation on the 5 thematic areas for [#GenderCOVID19](#) [#ResearchAgendaSetting](#)!

Big thank you to all who joined!

📺 Here are the recordings: [go.unu.edu/Sv1jH](https://go.unu.edu/Sv1jH)

👉 Post priority research questions on [ghhbuzzboard.org](https://ghhbuzzboard.org) before 15 Feb 2021!

**GENDER + COVID-19**  
**Research Agenda Setting**  
**Gender & Health Buzzboard is now live!**

Join us in the conversation and community  
<https://www.ghhbuzzboard.org/>

Share your suggestions, opinions and experiences for collective research prioritisation on gender and COVID-19

Gender & Health Hub  
UNU-IIGH

You and 6 others

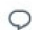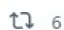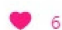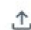

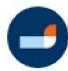

**Gender & Health Hub** ✓  
@genderhealthhub

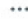

.@ClaireJStandley co-leads TG5 discussions on #Governance, #Relationships, #Regulation & #Power for #GenderCOVID19 #ResearchAgendaSetting on [ghhbuzzboard.org](https://ghhbuzzboard.org).

Tell us: Who are non-traditional actors that #HealthSystem leaders need to build better relationships with & How?

**Governance and Relationships for #GenderCOVID19 #ResearchAgendaSetting**

The COVID-19 pandemic has caused reverberations across all aspects of society - health systems can learn from this experience to better integrate input from non-traditional stakeholders, for more equitable and gender-responsive care.

**CLAIRE STANDLEY**  
Georgetown University  
Center for Global Health Science and Security



Gender & Health Hub  
Knowledge. Policy. Action.



UNITED NATIONS UNIVERSITY  
UNU-IHGH  
International Centre for  
Health, Gender & Equity

WWW.GHHBUZZBOARD.ORG @GENDERHEALTHHUB @GENDERHEALTHHUB

9:13 PM · Feb 24, 2021 · Twitter Web App

 View Tweet analytics

3 Retweets 1 Quote Tweet 9 Likes

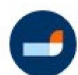

**Gender & Health Hub** ✓  
@genderhealthhub

...

@RosemaryJMorgan, co-lead of Thematic Grp 3 on Health Service Delivery in the #GenderCOVID19 #ResearchAgendaSetting initiative shares with us why strategic research is needed.

Tell us what research you think is important on [ghhbuzzboard.org](https://ghhbuzzboard.org)!

**Why #GenderCOVID19 #ResearchAgendaSetting?**

*"Data is power. If we are to effectively advocate for policies and interventions that address gender inequities related to COVID-19, research is needed which explicitly looks at the intersectional gendered health, social, and economic effects of COVID-19 and the impact on women, men, and gender minorities."*

— ROSEMARY MORGAN  
Johns Hopkins  
Bloomberg School of Public Health



Gender & Health Hub  
Knowledge. Policy. Action.



WWW.GHHBUZZBOARD.ORG @GENDERHEALTHHUB  
@GENDERHEALTHHUB

7:55 PM · Feb 22, 2021 · Twitter Web App

View Tweet analytics

11 Retweets 1 Quote Tweet 12 Likes

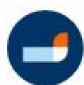

**Gender & Health Hub** @genderhealthhub · Mar 5, 2021

Nearly 400 people have signed up to #GenderCovid19 #ResearchAgendaSetting! 💡

👉 Members are also sharing their thoughts on skills that we, in gender and health, should master.

What are your thoughts? 💬

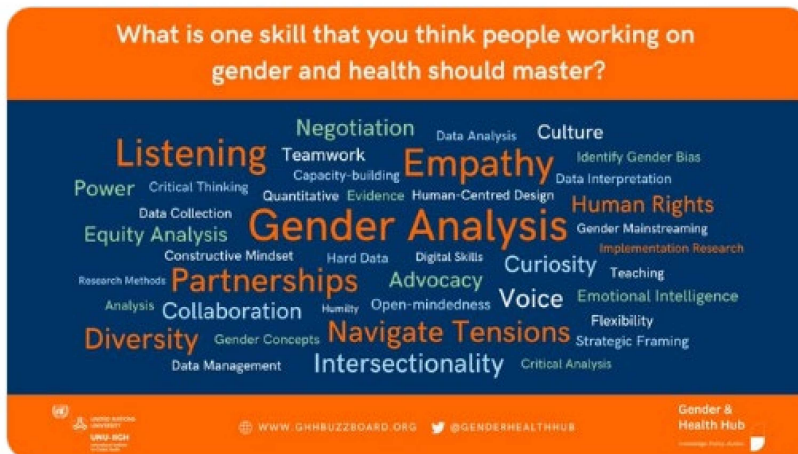

Pascale and 5 others

🗨️ 11 🍷 18 📤 📊

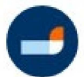

**Gender & Health Hub** @genderhealthhub · May 13, 2021

Contributing to the WHO COVID-19 Research Road Map?

Follow us for more ▶️ [ghhbuzzboard.org](http://ghhbuzzboard.org)

#GenderAndCOVID19 #ResearchAgendaSetting #BetterCOVIDScience

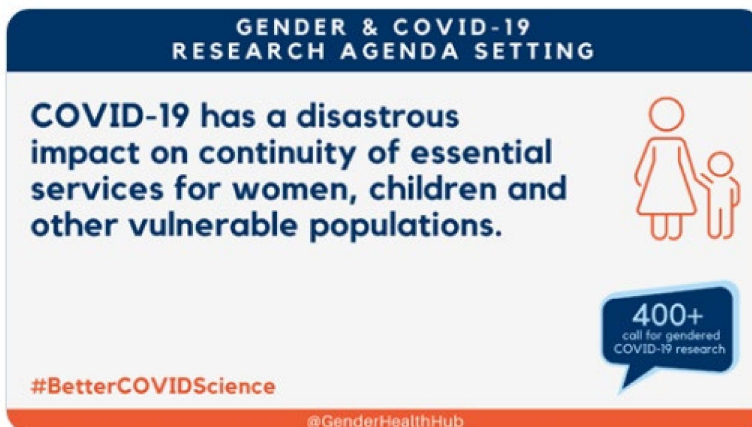

PMNCH and 9 others

🗨️ 1 🔄 6 🍷 10 📤 📊



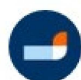

**Gender & Health Hub** @genderhealthhub · May 14, 2021

...

Contributing to the WHO COVID-19 Research Road Map?

Follow us for more [ghhbuzzboard.org](https://ghhbuzzboard.org)

#GenderAndCOVID19 #ResearchAgendaSetting #BetterCOVIDScience

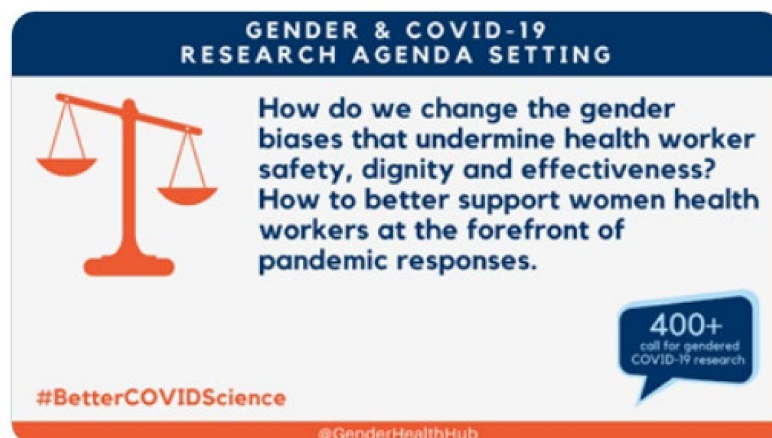

Jim Campbell and 3 others

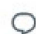

1

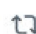

5

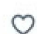

4

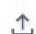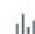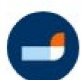

**Gender & Health Hub** @genderhealthhub · May 14, 2021

...

Contributing to the WHO COVID-19 Research Road Map?

Follow us for more [ghhbuzzboard.org](https://ghhbuzzboard.org)

#GenderAndCOVID19 #ResearchAgendaSetting #BetterCOVIDScience

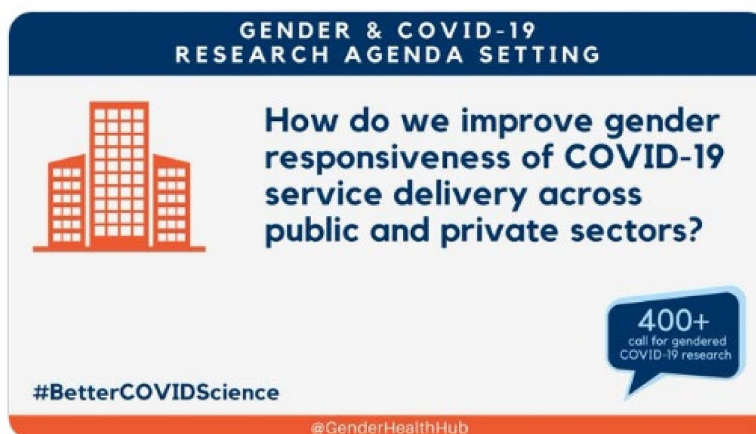

Dr Agnes Soucat and 2 others

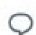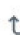

2

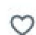

5

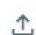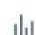

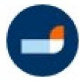

**Gender & Health Hub**  @genderhealthhub · May 15, 2021  
Contributing to the WHO COVID-19 Research Road Map?

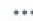

Follow us for more  [ghhbuzzboard.org](https://www.youtube.com/ghhbuzzboard.org)

#GenderAndCOVID19 #ResearchAgendaSetting #BetterCOVIDScience

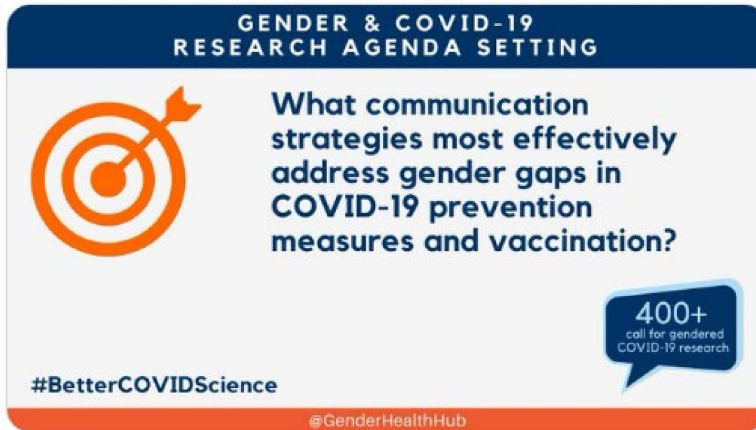

Tina D Purnat and 4 others

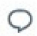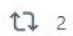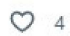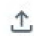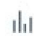

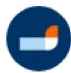

**Gender & Health Hub** @genderhealthhub · May 15, 2021 ...  
Day 2 | @WHO #RDBlueprint for Epidemics #COVID19 Global Research & Innovation Forum

Visit our page for key messages from the #GenderCovid19 #ResearchAgendaSetting process

What do 400+ stakeholders call for?

#BetterCOVIDScience

@ashageorge72 @lavanyav149 @PascaleAllotey

**Gender & Health Hub** @genderhealthhub · May 13, 2021  
Contributing to the WHO COVID-19 Research Road Map?  
Follow us for more ghhbuzzboard.org  
#GenderAndCOVID19 #ResearchAgendaSetting #BetterCOVIDScience

**GENDER & COVID-19  
RESEARCH AGENDA SETTING**

**400+**  
call for gendered  
COVID-19 research

**#BetterCOVIDScience**  
@GenderHealthHub

3 4

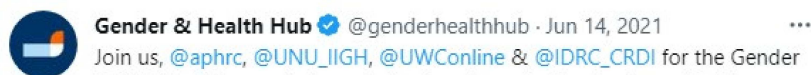

**Gender & Health Hub** @genderhealthhub · Jun 14, 2021

Join us, @aphrc, @UNU\_IIGH, @UWOnline & @IDRC\_CRDI for the Gender & COVID-19 Research Agenda-Setting: Consultation for Central & West Africa event.

📅 15 June, Tue  
🕒 11am GMT | 12pm CAT

🖱️ Register: [go.unu.edu/tjd3X](https://go.unu.edu/tjd3X)

In ENG & FRENCH

#ResearchAgendaSetting

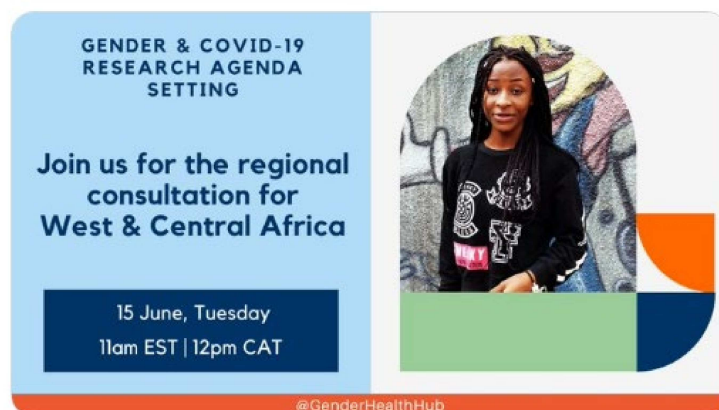

Africa Data Hub and 8 others

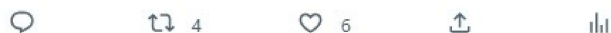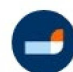

**Gender & Health Hub** @genderhealthhub · Jun 8, 2021

Join us, @UNU\_IIGH, @Ai4Women & @ABAADMENA for the Gender & COVID-19 Research Agenda-Setting: Consultation for the Middle East East & North Africa.

📅 9 June, Wed  
🖱️ Register: [genderhealthhub.org/articles/consu...](https://genderhealthhub.org/articles/consu...)

#ResearchAgendaSetting

@LinaAbiRafeh @MimiSfeir @anthony\_keedi @JenniferSkulte

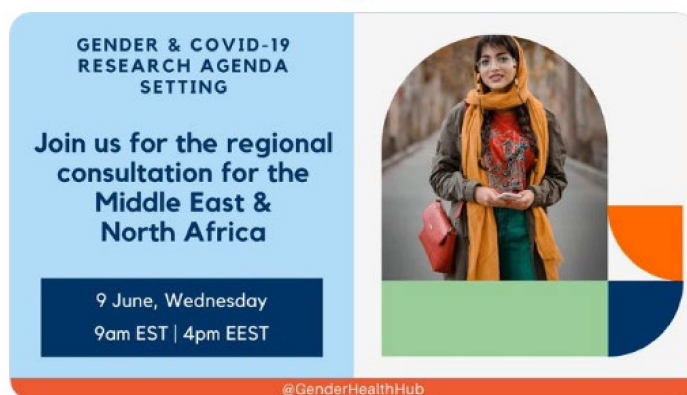

Jill Filipovic and 9 others

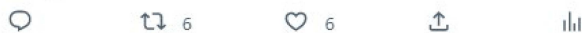

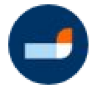

**Gender & Health Hub** @genderhealthhub · Jul 2, 2021

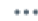

1. You can learn more about our global collaborative [#ResearchAgendaSetting](#) for [#GenderCOVID19](#) here

Solidarity Scale Impact

Survey: [ghhbuzzboard.org](http://ghhbuzzboard.org)

@ashageorge72 @SOPHUWC @DrMichelleRemme @lavanyav149

**GENDER & COVID-19 RESEARCH AGENDA SETTING**

**SETTING UP THE INITIATIVE**  
AUGUST 2020  
Setting up structures and initial planning for the agenda setting process, including formulation of the advisory group.

**STAKEHOLDER ENGAGEMENT**  
SEPTEMBER - NOVEMBER 2020  
Over 450 stakeholders signed up, with global representation and 67% from LMICs.

58 views | 0:31 / 2:20

[www.genderhealthhub.org](http://www.genderhealthhub.org)

The video thumbnail features a dark blue header with the title 'GENDER & COVID-19 RESEARCH AGENDA SETTING'. Below the header, the content is divided into two main sections. The first section, 'SETTING UP THE INITIATIVE', is dated 'AUGUST 2020' and describes the initial planning phase, including the formation of an advisory group. The second section, 'STAKEHOLDER ENGAGEMENT', is dated 'SEPTEMBER - NOVEMBER 2020' and reports that over 450 stakeholders signed up, with 67% from LMICs. The video player interface shows 58 views and a progress bar at 0:31 / 2:20. The website URL 'www.genderhealthhub.org' is visible at the bottom of the video frame.

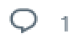

1

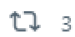

3

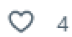

4

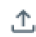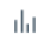

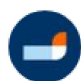

**Gender & Health Hub** @genderhealthhub · Jul 13, 2021

Emerging priority questions for Gender, COVID-19 & Health Service Delivery - Do you agree or disagree?

Check your email for your personalised link or email  
agendasetting@unu.edu

[#GenderCOVID19](#) [#ResearchAgendaSetting](#)  
[@PamojaUK](#) [@mamothena](#)

**Emerging Priority Questions: Week 1**

Research Agenda Setting for Gender and COVID-19  
Thematic Group 3: Health Service Delivery

How did health service delivery measures respond to the needs of pregnant women who tested positive for COVID-19?

What strategies were used to improve gender and other inequities in access and quality of care for COVID-19 services (testing, facility based care, quarantine care, etc.) and how effective were they?

Gender & Health Hub  
UNU-IIGH

UNU International Institute for Global Health and 6 others

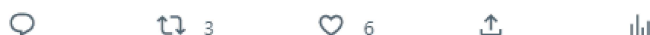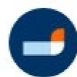

**Gender & Health Hub** @genderhealthhub · Jul 12, 2021

Emerging priority questions for Gender in COVID-19 Governance - Do you agree or disagree?

[#PatentSuspension](#) for [#Tocilizumab](#) in [#LMICs](#) is a good example

Check your email for your personalised link or email  
agendasetting@unu.edu

[#GenderCOVID19](#) [#ResearchAgendaSetting](#)

**Emerging Priority Questions Week 1**

Research Agenda Setting for Gender and COVID-19  
Thematic Group 5: Governance

What principles and strategies for linking marginalized communities with government health administrators and political decision makers best supports the advancement of gender and COVID-19 issues?

What are the gender dimensions of how global neoliberalism combined with nationalist populist leadership has shaped policy responses to pharmaceutical companies and their decisions on vaccine patents, pricing and supply?

Gender & Health Hub  
Knowledge. Policy. Action.

UNU International Institute for Global Health and 8 others

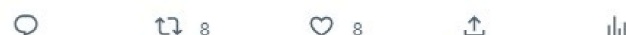

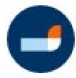

**Gender & Health Hub**  @genderhealthhub · Jul 9, 2021

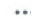

💡 Emerging priority questions for Sex and Gender in COVID-19 Therapeutics & Diagnostics - Do you agree or disagree?

📧 To complete the questionnaire: Check your email for your personalised link or email [agendasetting@unu.edu](mailto:agendasetting@unu.edu)

[#GenderCOVID19](#) [#ResearchAgendaSetting](#)

**Emerging Priority Questions Week 1**

**Research Agenda Setting for Gender and COVID-19**  
Thematic Group 2: Therapeutics & Diagnostics

How do the different aspects of human biology (i.e genetics, immunology, biochemistry, physiology, microbiota) contribute to sex-differences in pharmacokinetics, safety and efficacy of COVID-19 therapeutics and vaccines?

To what extent are the sex differences established in basic science research integrated into the early product development phase of potential therapeutic and prophylactic products for COVID-19?

**Gender & Health Hub**  
Knowledge. Policy. Action.

Jeannette Wolfe MD and 7 others

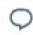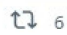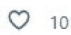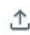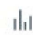

**Gender & Health Hub** @genderhealthhub · Sep 1, 2021

We are now live with the Gender and Health Research Agenda Setting for COVID-19: Initial Results session!

Join us, as our participants build consensus on research priorities to address a gender transformative health sector response to COVID-19.

[#ResearchAgendaSetting](#)

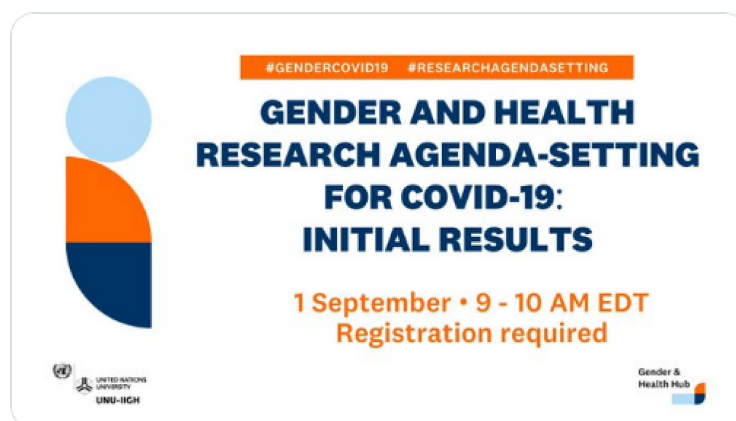

1

**Gender & Health Hub** @genderhealthhub · Sep 1, 2021

Join us in a collaborative gender & COVID-19 RAS exercise for the Gender & Health [#ResearchAgendaSetting](#) for COVID-19: Initial Results Webinar!

Introducing members of TG 5

[@ashageorge72](#)  
[@UWOnline](#)  
[@mmabzy](#)  
[@Afrolutionist](#)  
[@asoucat](#)  
[@AFD\\_France](#)

Register [go.unu.edu/iNsih](https://go.unu.edu/iNsih)

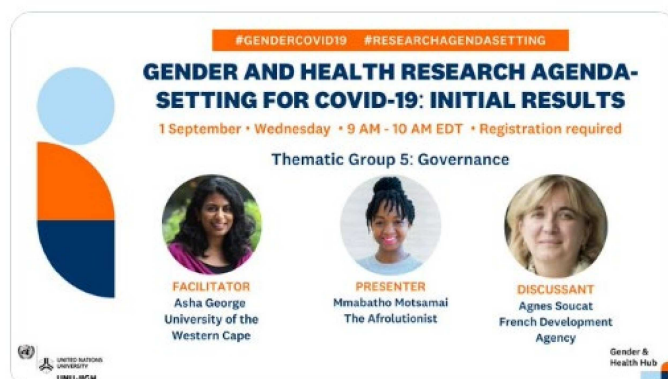

1



**Gender & Health Hub** @genderhealthhub · Aug 30, 2021

Join us in a collaborative gender & COVID-19 RAS exercise for the Gender & Health [#ResearchAgendaSetting](#) for COVID-19: Initial Results Webinar!

Members of TG 3

@PascaleAllotey

@UNU\_IGH

Sedighe Hosseini Jebeli, IUMS

@jeanvegamorales

@Fonasa

Register [go.unu.edu/iNsih](https://go.unu.edu/iNsih)

11 16

**Gender & Health Hub** @genderhealthhub · Aug 30, 2021

Join us in a collaborative gender & COVID-19 RAS exercise for the Gender & Health [#ResearchAgendaSetting](#) for COVID-19: Initial Results Webinar!

Introducing members of TG 1

@cabreulopes

@UNU\_IGH

@mishra\_gita

@UQ\_News

@TDPurnat

@WHO

Register [go.unu.edu/iNsih](https://go.unu.edu/iNsih)

3 9

**Gender & Health Hub** @genderhealthhub · Aug 29, 2021

Join us in a collaborative gender & COVID-19 RAS exercise for the Gender and Health **#ResearchAgendaSetting** for COVID-19: Initial Results Webinar!

Members of TG 4 📌

@DrMichelleRemme, @UNU\_IIGH  
 Atria Mier, @Arqaamdata  
 Mark Tomlinson, @StellenboschUni  
 Register: [go.unu.edu/iNsih](https://go.unu.edu/iNsih)

#GENDERCOVID19 #RESEARCHAGENDASETTING

**GENDER AND HEALTH RESEARCH AGENDA-SETTING FOR COVID-19: INITIAL RESULTS**

1 September • Wednesday • 9 AM - 10 AM EDT • Registration required

Thematic Group 4: Social determinants

**FACILITATOR**  
Michelle Remme  
UNU-IIGH

**PRESENTER**  
Atria Mier  
Gender, diversity, and protection specialist

**DISCUSSANT**  
Mark Tomlinson  
Stellenbosch University

Gender & Health Hub

🗨️ 4 ❤️ 9 📌 📊

**Gender & Health Hub** @genderhealthhub · Aug 28, 2021

Join us in a collaborative gender & COVID-19 RAS exercise for the Gender and Health **#ResearchAgendaSetting** for COVID-19: Initial Results Webinar!

Introducing members of TG 2 📌

@lavanyav149, @UNU\_IIGH  
 @WolfeJeannette, @UMassMedical  
 @heidari\_s, @WHO  
 Register: [go.unu.edu/iNsih](https://go.unu.edu/iNsih)

#GENDERCOVID19 #RESEARCHAGENDASETTING

**GENDER AND HEALTH RESEARCH AGENDA-SETTING FOR COVID-19: INITIAL RESULTS**

1 September • Wednesday • 9 AM - 10 AM EDT • Registration required

Thematic Group 2: Therapeutics & diagnostics

**FACILITATOR**  
Lavanya Vijayasingham  
UNU-IIGH

**PRESENTER**  
Jeannette Wolfe  
University of Massachusetts Medical School-Baystate

**DISCUSSANT**  
Shirin Heidari  
World Health Organization

Gender & Health Hub

🗨️ 5 ❤️ 7 📌 📊

**Gender & Health Hub** @genderhealthhub · Oct 8, 2021

REMINDER | The English version of the [#ResearchAgendaSetting](#) for [#GenderCovid19](#) is now available!

Please participate by using this link: [go.unu.edu/1FsUO](https://go.unu.edu/1FsUO)

Or contact us at [agendasetting@unu.edu](mailto:agendasetting@unu.edu)

Deadline for participation is 15 October 2021

Now available in 

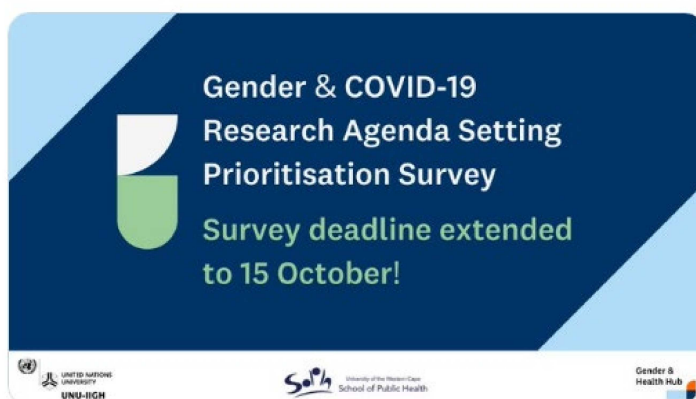

1 2 2

**Gender & Health Hub** @genderhealthhub · Sep 15, 2021

Des voix diverses autour du monde ont répondu à l'enquête [#ResearchAgendaSetting](#) [#GenderCovid19](#)!

Découvrez qui participe déjà, et participez aussi :

La date limite de participation à l'enquête : 30 septembre 2021.

[go.unu.edu/F1cTW](https://go.unu.edu/F1cTW)

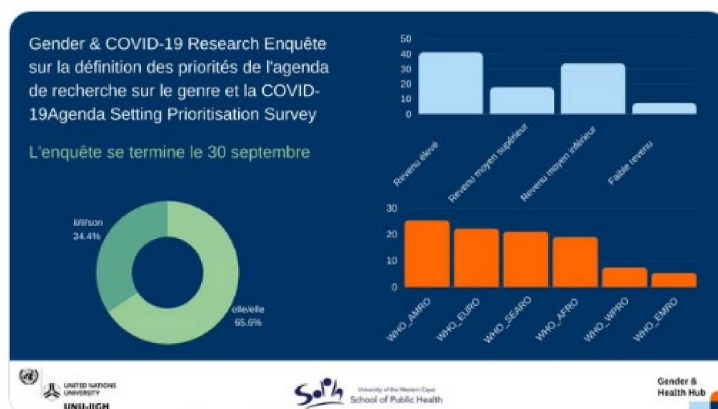

SMART Women's Initiative and 8 others

1 4 3

 **Gender & Health Hub**  @genderhealthhub · Oct 8, 2021 ⋮

💡 RAPPEL | La version française de l'enquête [#ResearchAgendaSetting](#) pour [#GenderCovid19](#) est maintenant disponible!

Veuillez participer en utilisant ce lien: [go.unu.edu/sejdm](https://go.unu.edu/sejdm)

Ou contactez-nous à [agendasetting@unu.edu](mailto:agendasetting@unu.edu)

Date limite de participation : 15 octobre 2021

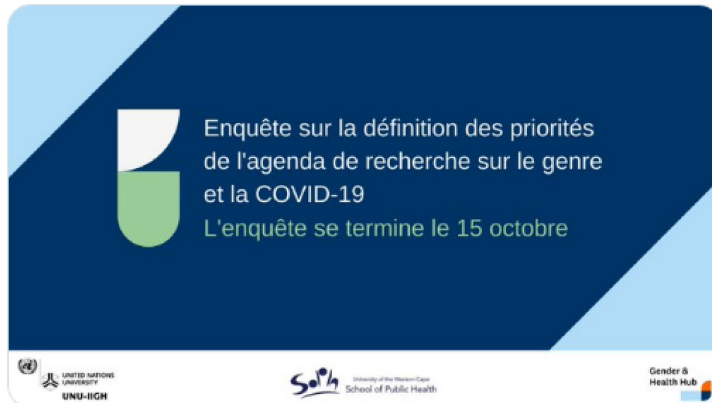

U of M Rady Faculty and 3 others

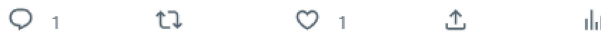

 **Gender & Health Hub**  @genderhealthhub · Oct 8, 2021 ⋮

💡 LEMBRETE | A versão Português de [#ResearchAgendaSetting](#) para [#GenderCovid19](#) já está disponível!

Use este link para participar: [go.unu.edu/ePHMr](https://go.unu.edu/ePHMr)

Ou contacte-nos em [agendasetting@unu.edu](mailto:agendasetting@unu.edu)

A data limite para participação na pesquisa é 15 de outubro de 2021.

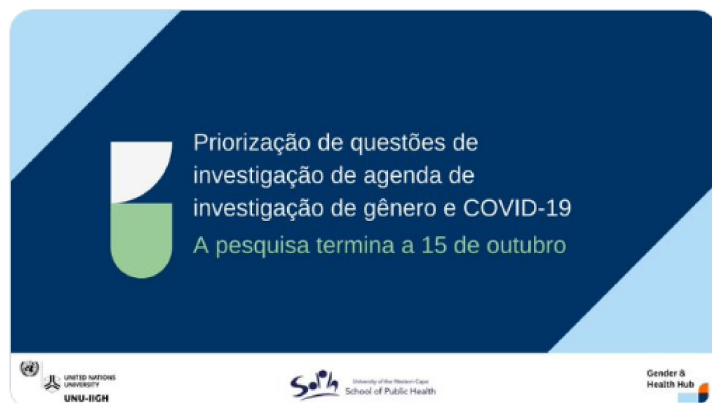

ULisboa and 2 others

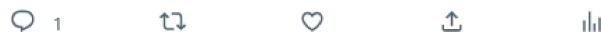

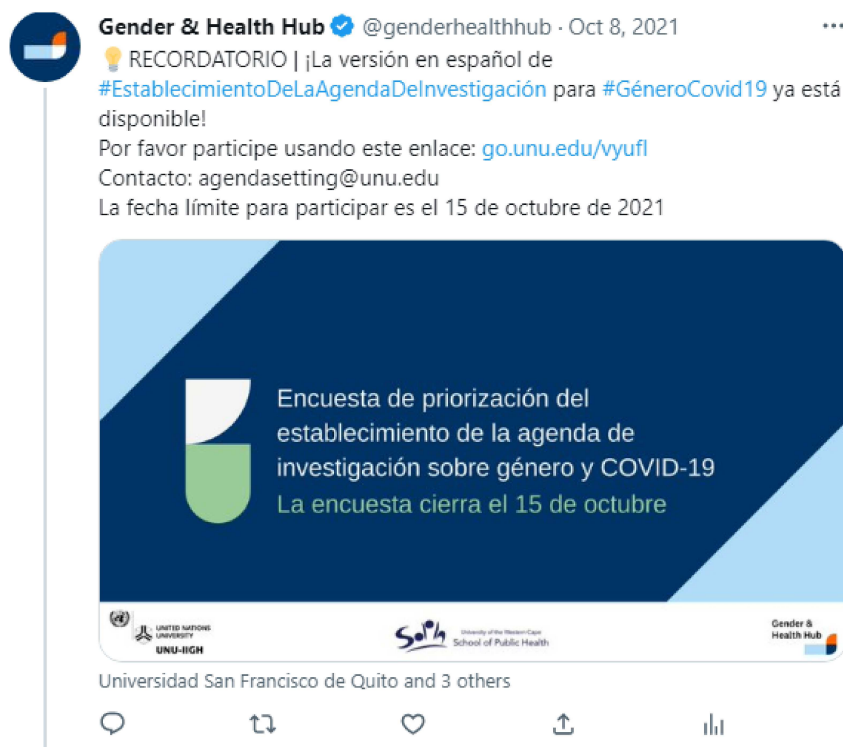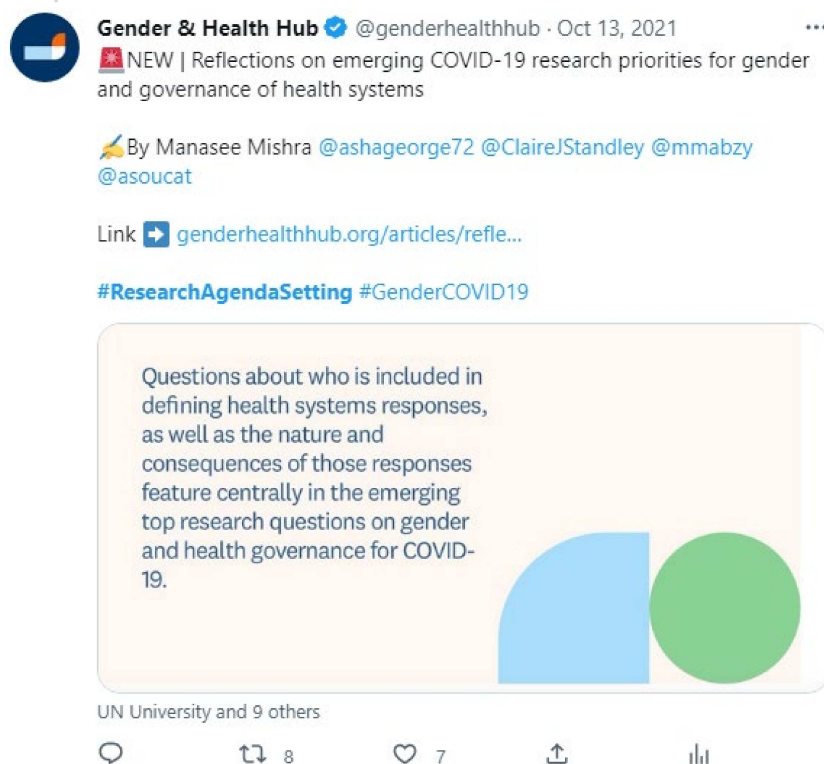

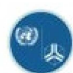

**UNU International Institute for Global...** @UNU\_... · Oct 21, 2021

The @genderhealthhub is now live with its 'Gender & COVID-19 Research Agenda Setting in Asia Pacific: Vaccinations' webinar!

Tune in to watch the live stream session here: [go.unu.edu/ZRuQu](https://go.unu.edu/ZRuQu).

#ResearchAgendaSetting #GenderCOVID19 #Fem4PeoplesVaccine

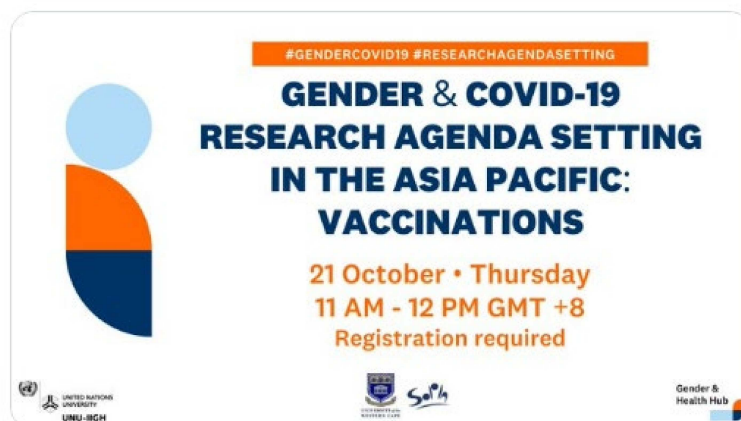

SOPH UWC and 2 others

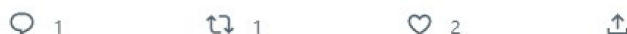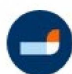

**Gender & Health Hub** @genderhealthhub · Oct 20, 2021

Gender & COVID-19 Vaccination

Join our webinar to learn strategies to promote & support research implementation of the collaboratively set agenda in #AsiaPacific

#GenderAndCOVID19 #ResearchAgendaSetting

Thu, 21 Oct

11am GMT

Register: [go.unu.edu/QV0nZ](https://go.unu.edu/QV0nZ)

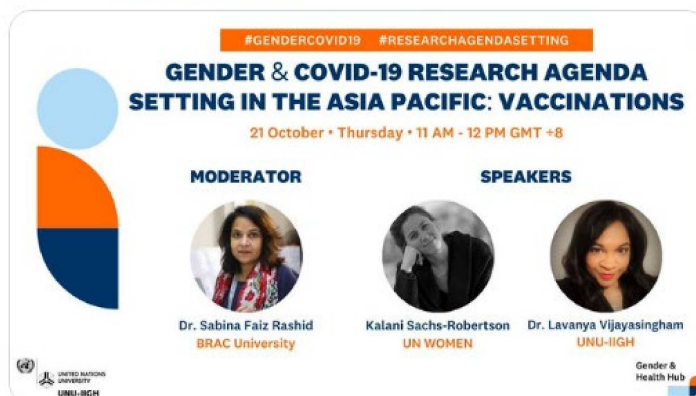

BRAC James P Grant School of Public Health and 6 others

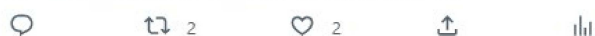

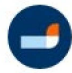

**Gender & Health Hub** @genderhealthhub · Oct 20, 2021

Barriers to COVID-19 vaccination access & delivery:

- ✗ Restrictive #GenderNorms
- ✗ Physical access
- ✗ Information gaps
- ✗ Intersecting vulnerabilities

Learn more, register for our webinar

[go.unu.edu/QV0nZ](https://go.unu.edu/QV0nZ)

Thu, 21 Oct  
11am GMT

#ResearchAgendaSetting #Fem4PeoplesVaccine

#GENDERCVID19 #RESEARCHAGENDASETING

### GENDER & COVID-19 RESEARCH AGENDA SETTING IN THE ASIA PACIFIC: VACCINATIONS

21 October • Thursday • 11 AM - 12 PM GMT +8

**PANELISTS**

|                                                                                                                                    |                                                                                                                                                            |                                                                                                                                               |
|------------------------------------------------------------------------------------------------------------------------------------|------------------------------------------------------------------------------------------------------------------------------------------------------------|-----------------------------------------------------------------------------------------------------------------------------------------------|
| <br><b>Dr. Kira Fortune</b><br>WHO WPRO<br>Manila | <br><b>Dr. Gunjan Taneja</b><br>Bill & Melinda Gates<br>Foundation, India | <br><b>Chee Yoke Ling</b><br>Third World Network<br>Malaysia |
|------------------------------------------------------------------------------------------------------------------------------------|------------------------------------------------------------------------------------------------------------------------------------------------------------|-----------------------------------------------------------------------------------------------------------------------------------------------|

Logos: WHO, UNU-IGH, Gender & Health Hub

World Health Organization Philippines and 7 others

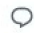

5

12

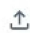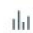

 **Gender & Health Hub**  @genderhealthhub · Oct 21, 2021 ⋮

🙌 Thanks so much to all of our guests at today's webinar!

🗣 Moderator:  
Dr. Sabina Faiz Rashid

👥 Guests:  
Kalani Sachs-Robertson, @lavanyav149, Dr. Kira Fortune, @gtanejatweets,  
@YokeLing15, @gita\_sen

[#ResearchAgendaSetting](#) [#GenderCOVID19](#) [#GHHTalks](#) [@WHOWPRO](#)

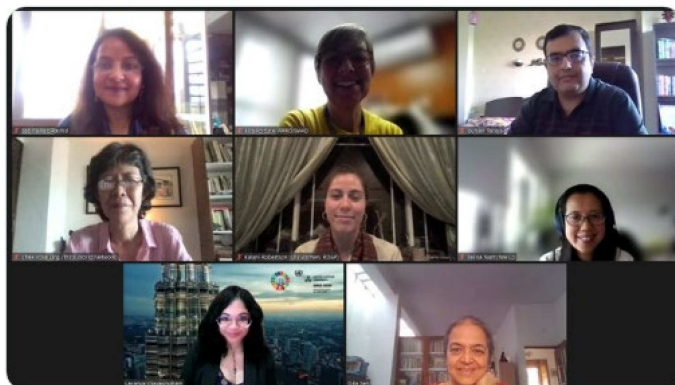

DAWN and 3 others

💬 1    ↻ 5    ❤️ 11    ↗    📊



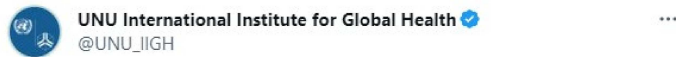

UNU International Institute for Global Health ✓  
@UNU\_IGH

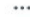

🌐 900 people globally were mobilised for #COVID19  
#ResearchAgendaSetting

📌 Register for @genderhealthhub's forum:  
[go.unu.edu/wVB9f](http://go.unu.edu/wVB9f)

With:

@PascaleAllotey @ashageorge72 @KarlaBerdichev1  
@gita\_sen @gmleungku  
Ana Maria Henao-Restrepo

#GHHForum2021 #Fem4PeoplesVaccine

**A Shared Gender  
& COVID-19  
Research Agenda**

9 December, 9:00-10:00PM (GMT +8)  
8-9AM EST | 2-3PM CEST

#GHHForum2021

Gender & Health Hub

Prof. Pascale Allotey  
UNU-IGH

Prof. Asha George  
University of the  
Western Cape

Dr. Karla Berdichevsky  
Feldman  
Ministry of Health,  
Mexico

Prof. Gita Sen  
Public Health  
Foundation of India

Prof. Gabriel Leung  
University of  
Hong Kong

Dr. Ana Maria Henao-  
Restrepo  
World Health  
Organization

UNU-IGH

👤 HKU – University of Hong Kong and 7 others

6:09 PM · Dec 2, 2021 · Twitter Web App

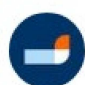

**Gender & Health Hub** @genderhealthhub · Dec 10, 2021

Prof @AshaGeorge72 of @SOPHUWC takes us through the year-long journey of collaboratively developing a research agenda to guide the application of a gender lens to #COVID-19 research investments, policy, & programming.

#GHHForum2021 #ResearchAgendaSetting

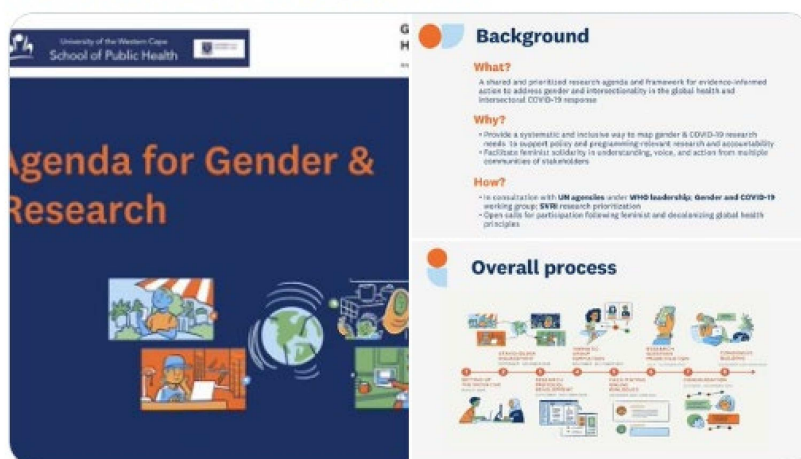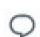

5

9

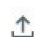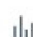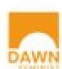

**DAWN** @DAWNfeminist · Dec 10, 2021

900 people globally were mobilised for the #Covid19 #ResearchAgendaSetting

Join us at #GHHForum2021 LIVE [youtu.be/HMQZygp5XA](https://youtu.be/HMQZygp5XA) and see the results for yourself.

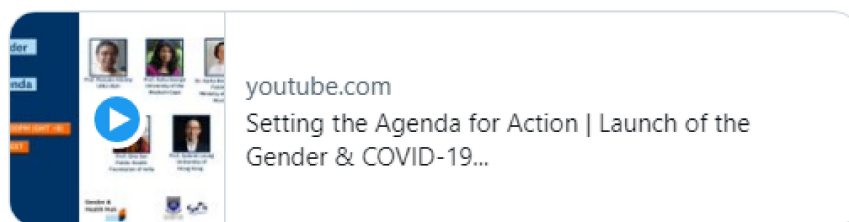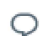

2

2

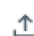

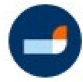

**Gender & Health Hub** @genderhealthhub · Dec 10, 2021 ...

Dr Ana Maria Henao-Restrepo talks about the work of @WHO in terms of gender, making the collection & analysis of gender data possible, & future steps on R&D & innovation for COVID-19.

[#GHHForum2021](#) [#ResearchAgendaSetting](#)

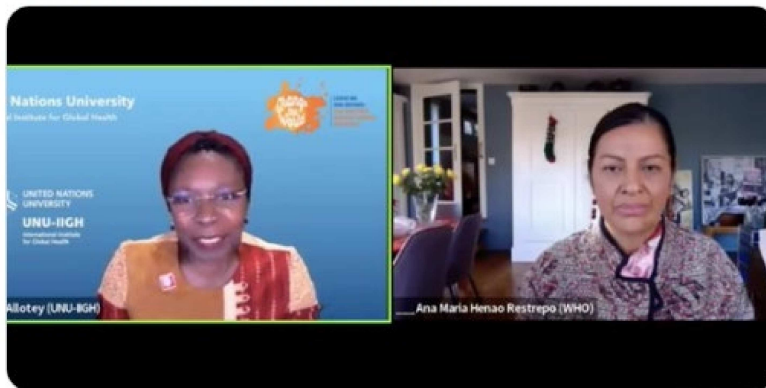

UNU International Institute for Global Health and 2 others

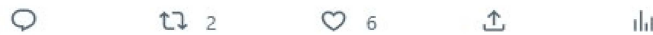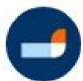

**Gender & Health Hub** @genderhealthhub · Dec 10, 2021 ...

"In India, sex-disaggregated data is available in vaccinations but not on infections, mortality, let alone an intersectional approach. It's not that information is not available; it's that it doesn't get reported," notes @gita\_sen

[#GHHForum2021](#) [#ResearchAgendaSetting](#)

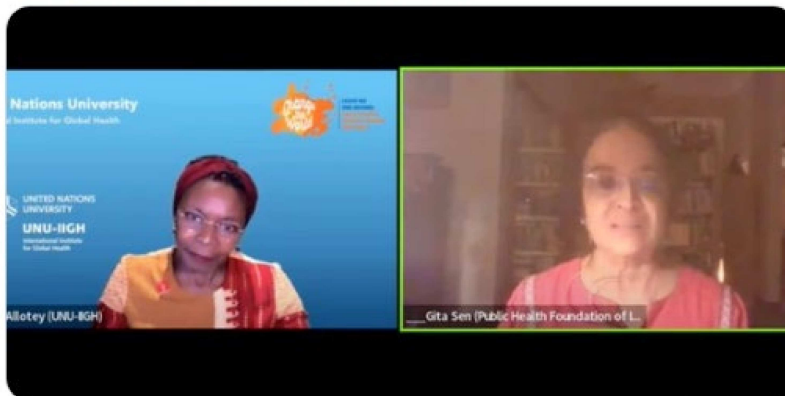

DAWN and 2 others

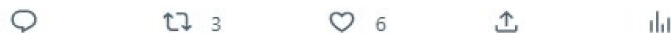

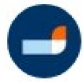

**Gender & Health Hub** @genderhealthhub · Dec 10, 2021

Panelists answer key questions on Gender & COVID-19

**#ResearchAgendaSetting:** Do the research priorities identified resonate with priorities in your field, country, or region? What are the immediate opportunities & next steps for the agenda to be implemented?

#GHHForum2021

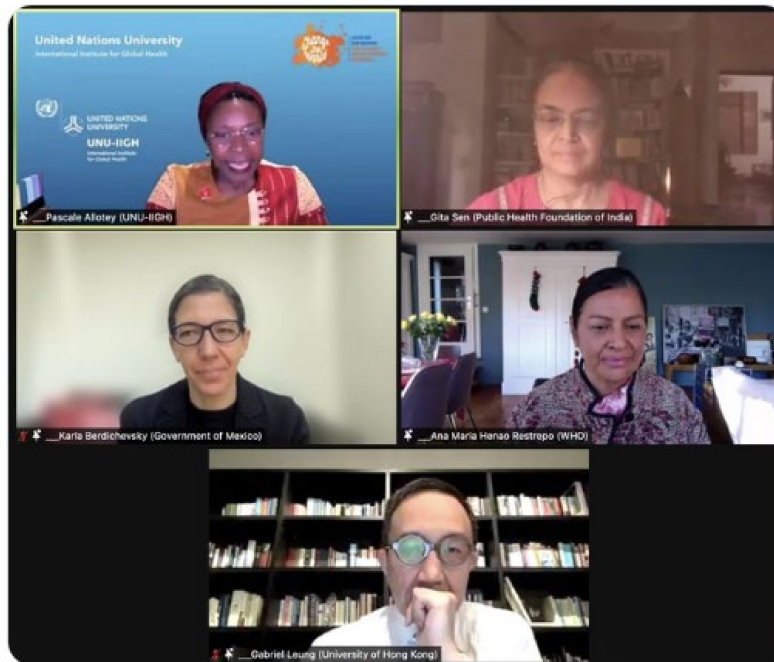

Pascale and 8 others

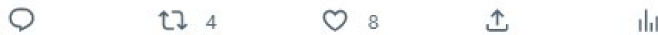

ARTICLES

17 DEC 2021 | 475 VIEWS | 11 LIKES

## Address gender barriers in delivery and demand to catalyse COVID-19 vaccine equity: The Asia Pacific context

Lavanya Vijayasingham (UNU-IIGH), Kalani Sachs-Robertson, Kira Fortune... [+4 more](#)

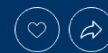

SOUTH-EAST ASIAN REGION

10 MINS

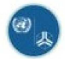

UNU International Institute for Global Health   
@UNU\_IIGH

...

Read the new [@genderhealthhub](#) article highlighting broad principles to support the better integration of gender-responsive programme design and implementation & watch the webinar on [#GenderCOVID19](#) [#ResearchAgendaSetting](#) in Asia Pacific: Vaccinations here 

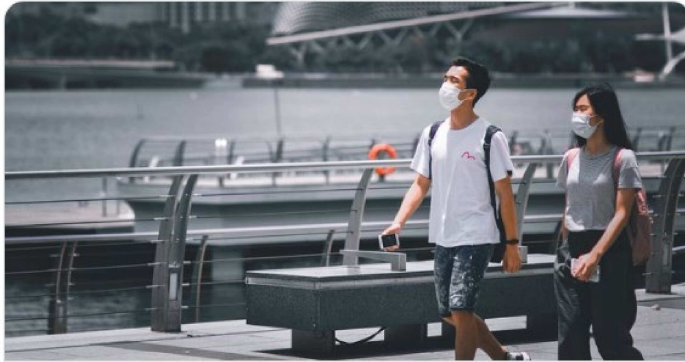

[genderhealthhub.org](https://genderhealthhub.org)

Address gender barriers in delivery and demand to catalyse COVID-19 vaccine equity: The Asia...

10:23 PM · Dec 20, 2021 · Twitter Web App

**Gender & Health Hub**  @genderhealthhub · Feb 24 ⋮  
 Gender issues: critical research for future pandemic preparedness presented by @ashageorge72

 24 Feb 6:25pm CET  
 Join the livestream: [go.unu.edu/o7itB](https://go.unu.edu/o7itB)

#ResearchAgendaSetting #HealthResearch #GenderAndCOVID19

Read more: [go.unu.edu/FCSSj](https://go.unu.edu/FCSSj)

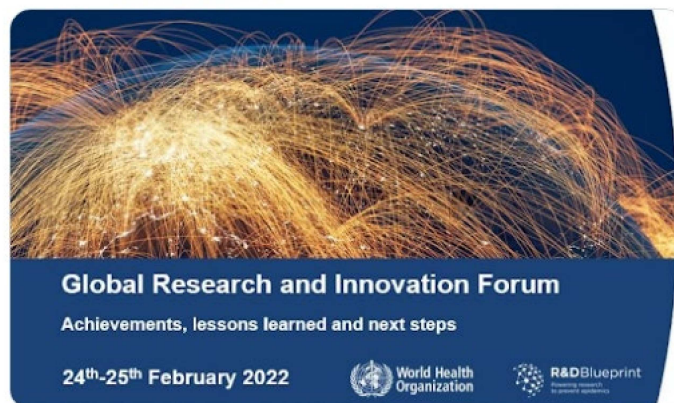

Pascale and 7 others

  10  11  

**Gender & Health Hub**  @genderhealthhub · Feb 24 ⋮  
 Don't miss @who @rd\_blueprint's COVID-19 Global Research and Innovation Forum: An invitation to the research community

Put it in your diary!  
 24 Feb 6:25pm CET  
 Join the livestream: [go.unu.edu/S0Pub](https://go.unu.edu/S0Pub)

#ResearchAgendaSetting #GlobalHealth #GenderAndCOVID19  
 @mamothena

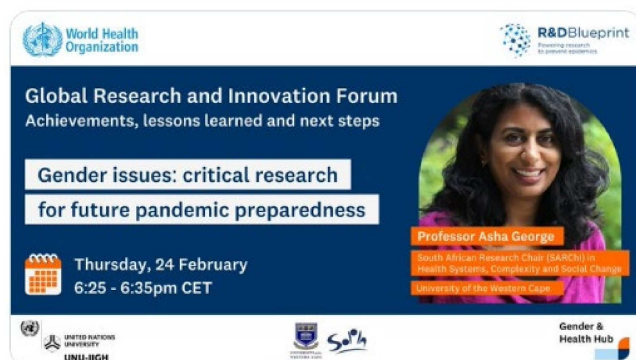

Asha George and 5 others

  5  17  

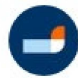

**Gender & Health Hub** @genderhealthhub · Feb 28

Download the results in    

[go.unu.edu/pfrdy](https://go.unu.edu/pfrdy)

#GlobalHealth #HealthResearch #ResearchAgendaSetting @ashageorge72 @rhona\_ona



“  
It is clear that sex and gender must be included in research investments informing immediate COVID-19 care and action, as well as long-term recovery.  
If not, scientific solutions will remain inadequate for a large part of the population and further delay the achievement of health and wellbeing for all.  
”

**A Shared Agenda for Gender & COVID-19 Research**

[Download the results](#)  
ENGLISH | FRENCH | SPANISH | PORTUGUESE

UNU International Institute for Global Health and 7 others

  7  8  

Supplement: bmjgh-2022-011315supp002_data_supplement.pdf [file bmjgh-2022-011315supp002_data_supplement.pdf]
